# Supplementary material for: Type I toxin-antitoxin systems contribute to the maintenance of mobile genetic elements in Clostridioides difficile
Source: PubMed Central journal article supplement (PMC7699646; doi:10.1038/s42003-020-01448-5), 2020-11-27
Supplement: 42003_2020_1448_MOESM3_ESM.pdf [file 42003_2020_1448_MOESM3_ESM.pdf]

## **Description of Additional Supplementary Files**

### **Supplementary Data 1**

**Description:** Strains and plasmids used in this study.

### **Supplementary Data 2**

**Description:** Oligonucleotides used in this study. Restriction sites are underlined. Lowercase bases indicate overlapping sequences. The promoter sequence for T7 polymerase is indicated in italics.

### **Supplementary Data 3**

**Description:** Source data for graphs in main Figures. The data used for Figures 3a, 3b, 3c, 4, 5b and 5c are included.
